# Supplementary material for: Matrine attenuates oxidative stress and cardiomyocyte apoptosis in doxorubicin-induced cardiotoxicity via maintaining AMPKα/UCP2 pathway
Source: PubMed Central journal article supplement — Acta Pharm Sin B. 2019 Mar 16;9(4):690–701. doi: 10.1016/j.apsb.2019.03.003 (PMC6664099; doi:10.1016/j.apsb.2019.03.003), 2019-03-16
Supplement: mmc1.pdf [file mmc1.pdf]

Supporting Information for

Original Article

**Matrine attenuates oxidative stress and cardiomyocyte apoptosis in doxorubicin-induced cardiotoxicity *via* maintaining AMPK $\alpha$ /UCP2 pathway**

Can Hu<sup>a,b,c,†</sup>, Xin Zhang<sup>a,b,c,†</sup>, Wenyong Wei<sup>a,b,c</sup>, Ning Zhang<sup>a,b,c</sup>, Haiming Wu<sup>a,b,c</sup>,  
Zhenguo Ma<sup>a,b,c</sup>, Lingli Li<sup>a,b,c</sup>, Wei Deng<sup>a,b,c,\*</sup>, Qizhu Tang<sup>a,b,c,\*</sup>

<sup>a</sup>Department of Cardiology, Renmin Hospital of Wuhan University, Wuhan 430060, China

<sup>b</sup>Cardiovascular Research Institute of Wuhan University, Wuhan 430060, China

<sup>c</sup>Hubei Key Laboratory of Cardiology, Wuhan 430060, China

Received 11 January 2019; received in revised form 2 February 2019; accepted 11 March 2019

\*Corresponding authors. Tel.: +86 27 88073385; fax: +86 27 88042292.

E-mail addresses: qztang@whu.edu.cn (Qizhu Tang), vivideng1982@whu.edu.cn (Wei Deng).

†These authors made equal contributions to this work.

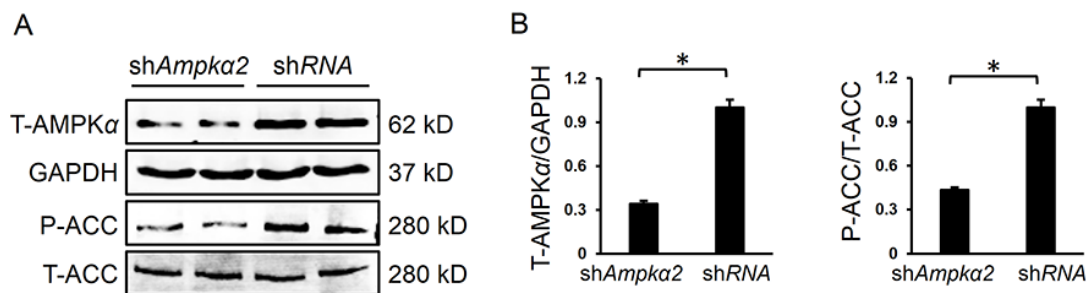

**Figure S1** Efficiency of shAmpka2 in H9C2 cells. (A) Western blot for AMPK $\alpha$  and ACC ( $n=6$ ). (B) Quantitative data for AMPK $\alpha$  and ACC ( $n=6$ ). Values represent the mean $\pm$ SEM.

\* $P<0.05$  versus the matched groups.
